# Supplementary material
Source: MDPI journal article supplement (https://www.mdpi.com/2072-4292/12/24/4082)
Supplement: s1 [file s1]

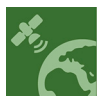**Table S1:** Confusion matrix between field recognition and image classification

| Class              | Built-up areas | Forests | Shrubs | Grasslands | Mangroves | Bare lands | Water areas | Total | Producer precision (%) |
|--------------------|----------------|---------|--------|------------|-----------|------------|-------------|-------|------------------------|
| Built-up areas     | 44             | 0       | 0      | 0          | 0         | 6          | 0           | 50    | 88.0                   |
| Forests            | 0              | 50      | 0      | 0          | 0         | 0          | 0           | 50    | 100.0                  |
| Shrubs             | 1              | 13      | 21     | 13         | 0         | 1          | 0           | 49    | 42.9                   |
| Grasslands         | 0              | 8       | 8      | 34         | 0         | 0          | 0           | 50    | 68.0                   |
| Mangroves          | 0              | 5       | 2      | 0          | 36        | 4          | 0           | 47    | 76.6                   |
| Bare lands         | 3              | 0       | 0      | 0          | 0         | 43         | 0           | 46    | 93.5                   |
| Water areas        | 0              | 0       | 0      | 0          | 0         | 2          | 46          | 48    | 95.8                   |
| Total              | 48             | 76      | 31     | 47         | 36        | 56         | 46          | 340   |                        |
| User precision (%) | 91.7           | 65.8    | 67.7   | 72.3       | 100.0     | 76.8       | 100.0       | 80.6  |                        |
